# Supplementary material for: Fabrication of Noble-Metal-Free Mo2C/CdIn2S4 Heterojunction Composites with Elevated Carrier Separation for Photocatalytic Hydrogen Production
Source: MDPI journal article supplement (doi:10.3390/molecules28062508), 2023-03-09
Supplement: s1 [file s1]

# Fabrication of Noble-Metal-Free Mo<sub>2</sub>C/CdIn<sub>2</sub>S<sub>4</sub> Heterojunction Composites With Elevated Carrier Separation for Photocatalytic Hydrogen Production

Hong Qiu, Xiaohui Ma, Hongxia Fan, Yueyan Fan, Yajie Li, Hualei Zhou\* and Wenjun Li\*

Beijing Key Laboratory for Science and Application of Functional Molecular and Crystalline Materials, University of Science and Technology Beijing, Beijing 100083, China

\*Correspondence: wjli\_ustb@163.com, hlzhou@ustb.edu.cn

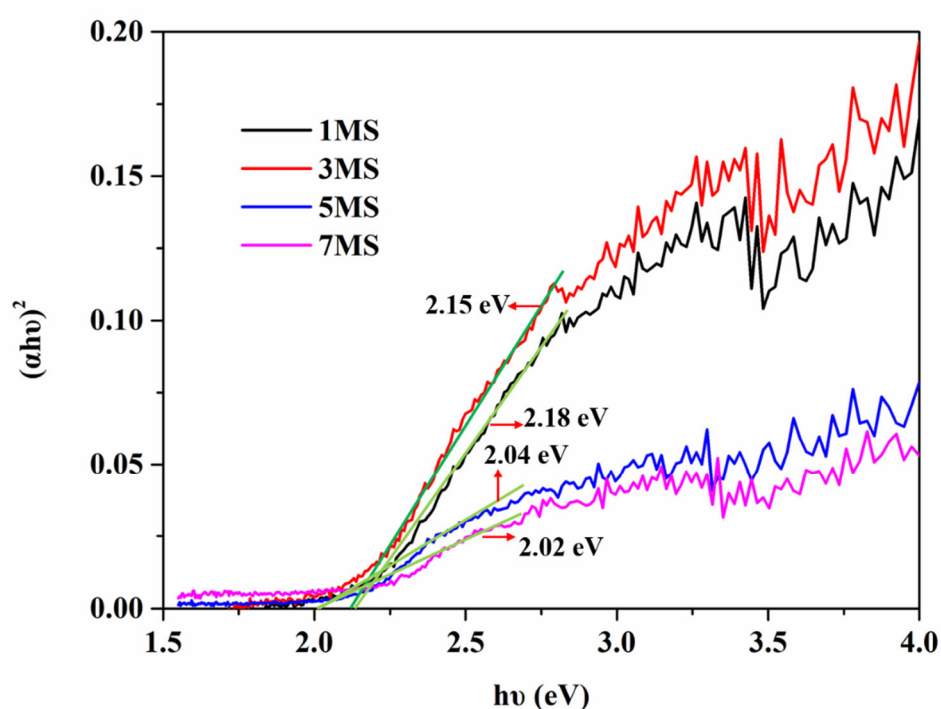

Fig. S1 Tauc's curve of MS heterojunction composites.

**Table S1. The incident radiation intensity entering the photoreactor is shown in the table below.**

|                                             | 1     | 2    | 3    | 4    | 5    | 6    | 7    | 8    | 9    |
|---------------------------------------------|-------|------|------|------|------|------|------|------|------|
| Optical power density (mW/cm <sup>2</sup> ) | 146.5 | 45.4 | 56.7 | 63.6 | 40.6 | 53.3 | 34.8 | 53.7 | 50.4 |

|                                        |        |
|----------------------------------------|--------|
| Average value<br>(mW/cm <sup>2</sup> ) | 60.6   |
| Reactor area<br>(cm <sup>2</sup> )     | 19.6   |
| Incident radiation intensity<br>(mW)   | 1186.9 |

We measured the intensity of the incident radiation entering the photoreactor by an optical power meter (CEL-2000-2, China). Calculate the intensity of incident radiation by measuring the optical power density at ten different positions of the photoreactor according to the following formula:

$$E = P_{\text{Average}} * A$$

Where E,  $P_{\text{Average}}$  and A stand for the intensity of the incident radiation, the power density of light and the irradiation area, respectively.

**Table S2. Comparison of hydrogen evolution data of Mo<sub>2</sub>C/CdIn<sub>2</sub>S<sub>4</sub> composites compared with other literature reports.**

| Photocatalysts                                                                                   | Noble metal  | H <sub>2</sub> evolution                     | Ref.      |
|--------------------------------------------------------------------------------------------------|--------------|----------------------------------------------|-----------|
| Mo <sub>2</sub> C/CdIn <sub>2</sub> S <sub>4</sub>                                               | No           | 1178.32 $\mu\text{mol g}^{-1} \text{h}^{-1}$ | This work |
| MoP/CdIn <sub>2</sub> S <sub>4</sub>                                                             | No           | 286.10 $\mu\text{mol g}^{-1} \text{h}^{-1}$  | [1]       |
| Co <sub>2</sub> P/CdIn <sub>2</sub> S <sub>4</sub>                                               | No           | 471.87 $\mu\text{mol g}^{-1} \text{h}^{-1}$  | [2]       |
| Co <sub>9</sub> S <sub>8</sub> /CdIn <sub>2</sub> S <sub>4</sub>                                 | No           | 1083.6 $\mu\text{mol g}^{-1} \text{h}^{-1}$  | [3]       |
| CdIn <sub>2</sub> S <sub>4</sub> /CNFs/Co <sub>4</sub> S <sub>3</sub>                            | No           | 25.87 mmol $\text{g}^{-1} \text{h}^{-1}$     | [4]       |
| ZnIn <sub>2</sub> S <sub>4</sub> /CdIn <sub>2</sub> S <sub>4</sub>                               | 0.75 wt% PdS | 780 $\mu\text{mol h}^{-1}$                   | [5]       |
| MoS <sub>2</sub> /CdIn <sub>2</sub> S <sub>4</sub>                                               | No           | 1868.19 $\mu\text{mol g}^{-1} \text{h}^{-1}$ | [6]       |
| MoS <sub>x</sub> /CdIn <sub>2</sub> S <sub>4</sub>                                               | No           | 2846.73 $\mu\text{mol g}^{-1} \text{h}^{-1}$ | [7]       |
| In <sub>2</sub> S <sub>3</sub> /CdIn <sub>2</sub> S <sub>4</sub> /In <sub>2</sub> O <sub>3</sub> | Pt           | 2004 $\mu\text{mol g}^{-1} \text{h}^{-1}$    | [8]       |

## References

[1] X. Ma, W. Li, C. Ren, M. Dong, L. Geng, H. Fan, Y. Li, H. Qiu, T. Wang, Construction of novel noble-metal-free MoP/CdIn<sub>2</sub>S<sub>4</sub> heterojunction photocatalysts:

Effective carrier separation, accelerating dynamically H<sub>2</sub> release and increased active sites for enhanced photocatalytic H<sub>2</sub> evolution, *J Colloid Interface Sci*, 628 (2022) 368-377.

[2] X. Ma, W. Li, H. Li, M. Dong, L. Geng, T. Wang, H. Zhou, Y. Li, M. Li, Novel noble-metal-free Co<sub>2</sub>P/CdIn<sub>2</sub>S<sub>4</sub> heterojunction photocatalysts for elevated photocatalytic H<sub>2</sub> production: Light absorption, charge separation and active site, *Journal of Colloid and Interface Science*, 639 (2023) 87-95.

[3] C. Li, Y. Zhao, X. Liu, P. Huo, Y. Yan, L. Wang, G. Liao, C. Liu, Interface engineering of Co<sub>9</sub>S<sub>8</sub>/CdIn<sub>2</sub>S<sub>4</sub> ohmic junction for efficient photocatalytic H<sub>2</sub> evolution under visible light, *J Colloid Interface Sci*, 600 (2021) 794-803.

[4] S. Guo, Y. Li, C. Xue, Y. Sun, C. Wu, G. Shao, P. Zhang, Controllable construction of hierarchically CdIn<sub>2</sub>S<sub>4</sub>/CNFs/Co<sub>4</sub>S<sub>3</sub> nanofiber networks towards photocatalytic hydrogen evolution, *Chemical Engineering Journal*, 419 (2021) 129213.

[5] Y. Yu, G. Chen, G. Wang, Z. Lv, Visible-light-driven ZnIn<sub>2</sub>S<sub>4</sub>/CdIn<sub>2</sub>S<sub>4</sub> composite photocatalyst with enhanced performance for photocatalytic H<sub>2</sub> evolution, *International Journal of Hydrogen Energy*, 38 (2013) 1278-1285.

[6] B. Zhang, H.X. Shi, X.Y. Hu, Y.S. Wang, E.Z. Liu, J. Fan, A novel S-scheme MoS<sub>2</sub>/CdIn<sub>2</sub>S<sub>4</sub> flower-like heterojunctions with enhanced photocatalytic degradation and H<sub>2</sub> evolution activity, *Journal of Physics D: Applied Physics*, 53 (2020) 205101.

[7] Q. Li, W.L. Liu, X.J. Xie, X.L. Yang, X.F. Chen, X.G. Xu, Synthesis and Characterization of Amorphous Molybdenum Sulfide (MoS<sub>x</sub>)/CdIn<sub>2</sub>S<sub>4</sub> Composite Photocatalyst: Co-Catalyst Using in the Hydrogen Evolution Reaction, *Catalysts* 2020, 10, 1455.

[8] D. Ma, J.W. Shi, Y. Zou, Z. Fan, J. Shi, L. Cheng, D. Sun, Z. Wang, C. Niu, Multiple carrier-transfer pathways in a flower-like In<sub>2</sub>S<sub>3</sub>/CdIn<sub>2</sub>S<sub>4</sub>/In<sub>2</sub>O<sub>3</sub> ternary heterostructure for enhanced photocatalytic hydrogen production, *Nanoscale*, 10 (2018) 7860-7870
